# Supplementary material
Source: Springer Nature journal article supplement (https://www.springermedizin.de/resource/supplementary/12885_2008_1200_MOESM2_ESM.pdf/9471410)
Supplement: MOESM2 [file 9471410]

ATBF1-A

|                                  | D16S 3031 | D16S 752 | D16S 3106 | D16S 3018 | D16S 3049 | D16S 504 |
|----------------------------------|-----------|----------|-----------|-----------|-----------|----------|
| <i>LOH at ATBF1-A gene locus</i> |           |          |           |           |           |          |
|                                  |           |          |           |           |           |          |
|                                  |           |          |           |           |           |          |
|                                  |           |          |           |           |           |          |
|                                  |           |          |           |           |           |          |
|                                  |           |          |           |           |           |          |
|                                  |           |          |           |           |           |          |
|                                  |           |          |           |           |           |          |
|                                  |           |          |           |           |           |          |
|                                  |           |          |           |           |           |          |
|                                  |           |          |           |           |           |          |
|                                  |           |          |           |           |           |          |
|                                  |           |          |           |           |           |          |
|                                  |           |          |           |           |           |          |
|                                  |           |          |           |           |           |          |
| <i>ROH</i>                       |           |          |           |           |           |          |
|                                  |           |          |           |           |           |          |
|                                  |           |          |           |           |           |          |
|                                  |           |          |           |           |           |          |
|                                  |           |          |           |           |           |          |
|                                  |           |          |           |           |           |          |
|                                  |           |          |           |           |           |          |
|                                  |           |          |           |           |           |          |
|                                  |           |          |           |           |           |          |
|                                  |           |          |           |           |           |          |
|                                  |           |          |           |           |           |          |
|                                  |           |          |           |           |           |          |
|                                  |           |          |           |           |           |          |
|                                  |           |          |           |           |           |          |
|                                  |           |          |           |           |           |          |
| <i>Not Determined</i>            |           |          |           |           |           |          |
|                                  |           |          |           |           |           |          |
|                                  |           |          |           |           |           |          |
|                                  |           |          |           |           |           |          |
|                                  |           |          |           |           |           |          |
|                                  |           |          |           |           |           |          |
|                                  |           |          |           |           |           |          |

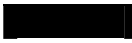

loss of heterozygosity

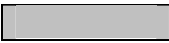

retention of heterozygosity

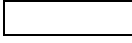

not informative
